# Supplementary material for: Erythrocyte membrane-camouflaged Prussian blue nanocomplexes for combinational therapy of triple-negative breast cancer
Source: Royal Society of Chemistry journal article supplement (doi:10.1039/d2tb02289c), 2023-01-01
Supplement: d2tb02289c1.pdf [file d2tb02289c1.pdf]

## Supplementary materials

### Erythrocyte membrane camouflaged Prussian blue nanocomplexes for combinational therapy of triple negative breast cancer

Simin Chen<sup>a#</sup>, Jialong Fan<sup>a#</sup>, Feng Xiao<sup>a</sup>, Yan Qin<sup>a,c</sup>, Ying Long<sup>a</sup>, Liqin Yuan<sup>b\*</sup>, Bin Liu<sup>a\*</sup>

<sup>a</sup> College of Biology, Hunan University, Changsha, 410082, China

<sup>b</sup> Department of General Surgery, Department of Burn and Plastic Surgery, The Second Xiangya Hospital, Central South University, Changsha, Hunan, 410011, P.R. China

<sup>c</sup> TCM and Ethnomedicine Innovation & Development International Laboratory, School of Pharmacy, Hunan University of Chinese Medicine, Changsha, Hunan, 410208, P.R. China

\* To whom correspondence should be addressed. Tel: +86-731-89720939; Fax: +86-731-89720939.

\*Corresponding authors. E-mail: binliu2001@hotmail.com (B Liu); yuanliqin@csu.edu.cn (L. Yuan)

<sup>#</sup>These authors contributed equally to this work.

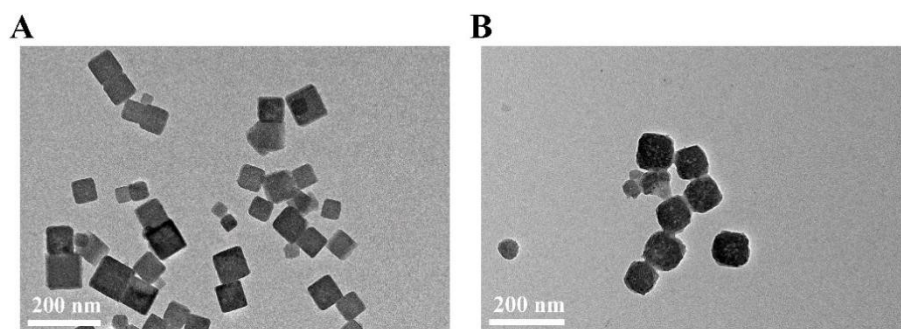

**Fig.S1 TEM images of PB NPs and PM NPs.** (A) and (B) TEM images of PB NPs and PM NPs under low magnification.

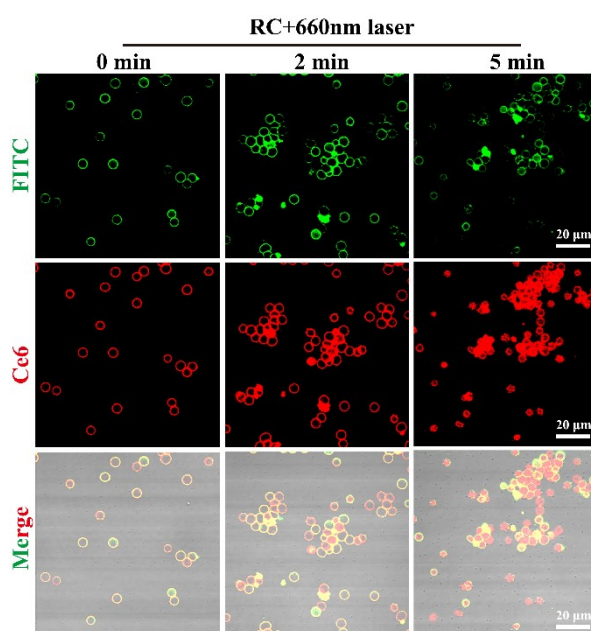

**Fig.S2 Characterization of RC.** Co-localized fluorescence imaging of Ce6 and FITC-labeled erythrocyte membrane and the effects of laser exposure time on the structural alteration of cell membrane (100 mW/cm<sup>2</sup>).

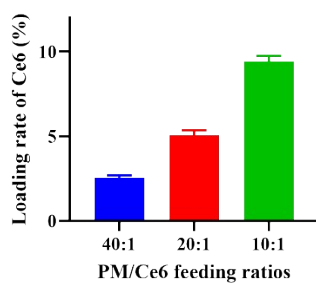

**Fig.S3 Loading rate of Ce6.** Ce6 loading efficiency of RC when the Ce6 concentration was 0.025, 0.05, 0.1, mg/mL, respectively.

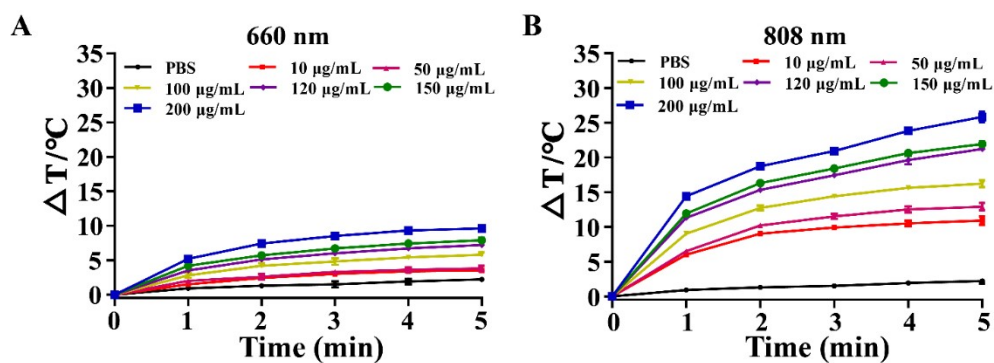

**Fig.S4 Temperature variation of PMPCR NPs under laser irradiation.** (A) and (B): The temperature curves of PMPCR NPs with 660 nm or 808 nm laser irradiation.

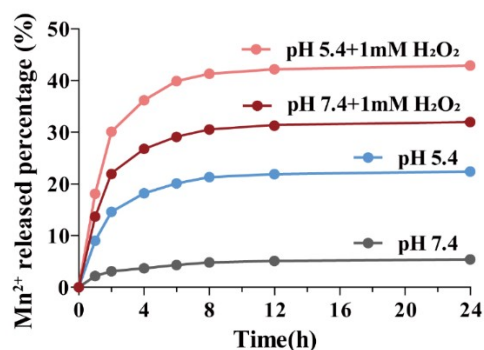

**Fig.S5 Mn<sup>2+</sup> release behavior.** Released amount of Mn<sup>2+</sup> from PMPCR NPs in PBS at pH7.4 or pH5.4 with or without H<sub>2</sub>O<sub>2</sub> (1 mM) in the presence of GSH (2 mM).

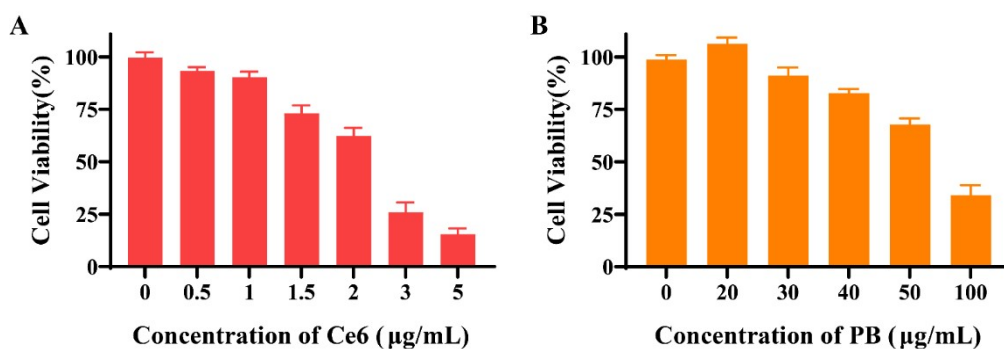

**Fig.S6 In vitro cytotoxicity of Ce6 and PB NPs with different concentrations.** (A) MTT assay of 4T1 cells after treatment with Ce6 for 24 h. (B) MTT assay of 4T1 cells after treatment with PB NPs for 24 h. 6 h later, the cells were subjected to dual laser irradiation (660 nm, 100 mW/cm<sup>2</sup>; 808 nm, 1 W/cm<sup>2</sup>) for 5 min. PBS was used as the negative control.

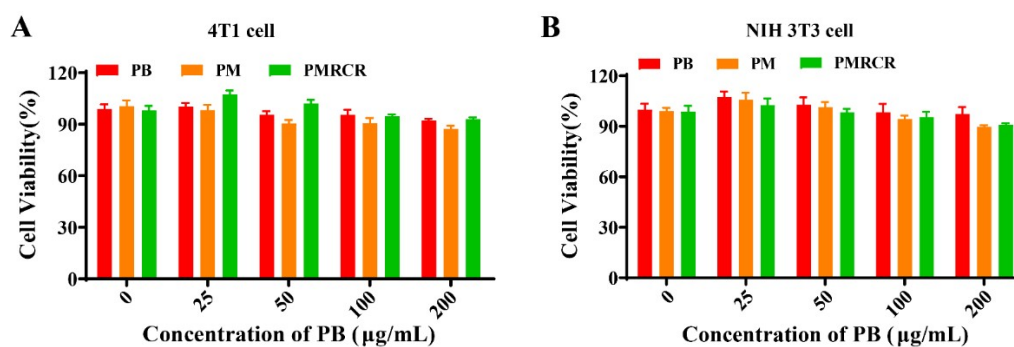

**Fig.S7. Cytotoxicity analysis of PMRCR NPs.** (A and B) Viability of 4T1 and NIH3T3 cells treated with PB NPs, PM NPs, or PMRCR NPs for 24 h (n=3).

## Full uncropped Western blots in Supporting Information

**Fig.4E**

### Membrane-1

β-actin

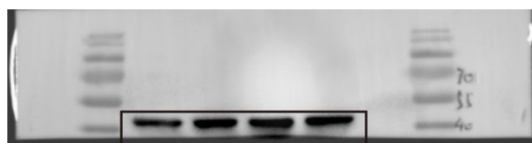

P-Caspase-3

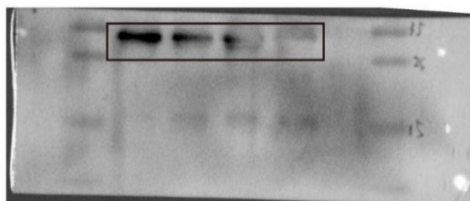

### Membrane-1

β-actin

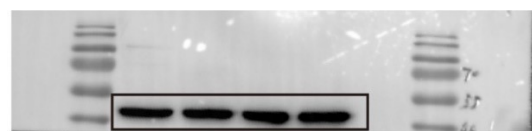

Bcl-2

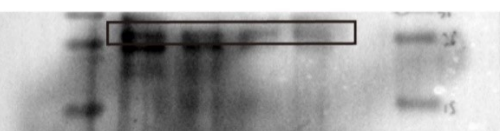

### Membrane-1

β-actin

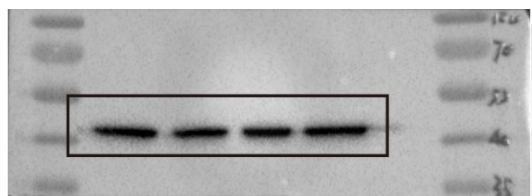

BAX

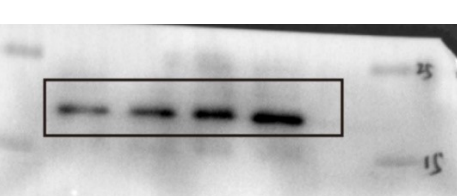

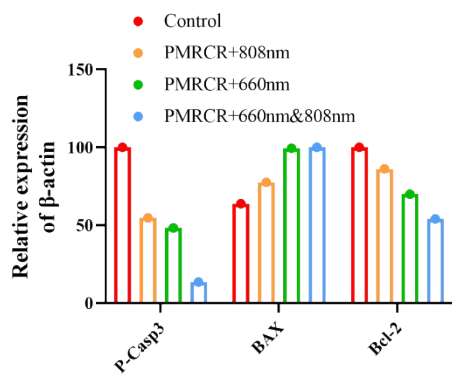

The relative analysis of above protein.
